# Supplementary material for: A novel FOXM1 isoform, FOXM1D, promotes epithelial–mesenchymal transition and metastasis through ROCKs activation in colorectal cancer
Source: PubMed Central journal article supplement — Oncogene. 2016 Jul 11;36(6):807–19. doi: 10.1038/onc.2016.249 (PMC5311249; doi:10.1038/onc.2016.249), 2016-07-11

**a**

## Peptides sequence from LC-MS

|   | A3 | Sequence     | # PSMs | # Proteins | # Protein Groups | Protein Group Accessions | Modifications        | $\Delta Cn$ | Area    | IonScore | Exp Value | Charge | MH+ [Da]   | $\Delta M$ [ppm] | RT [min] | # Missed Cleavages |
|---|----|--------------|--------|------------|------------------|--------------------------|----------------------|-------------|---------|----------|-----------|--------|------------|------------------|----------|--------------------|
| 1 | ●  | GAFGEVQLVR   | 1      | 5          | 1                | D6REE7                   |                      | 0.0000      | 1.561e7 | 55       | 1.4E-004  | 2      | 1075.58696 | -2.39            | 35.61    | 0                  |
| 2 | ●  | ENLLLSDSPScR | 1      | 3          | 1                | D6REE7                   | C11(Carbamidomethyl) | 0.0000      | 1.109e7 | 46       | 6.8E-004  | 2      | 1390.65911 | -2.92            | 33.54    | 0                  |
| 3 | ●  | SDSAFFWEER   | 1      | 5          | 1                | D6REE7                   |                      | 0.0000      | 6.009e6 | 40       | 6.4E-004  | 2      | 1273.54448 | -3.12            | 40.60    | 0                  |
| 4 | ●  | AEDYDVVK     | 1      | 3          | 1                | D6REE7                   |                      | 0.0000      | 5.490e6 | 38       | 4.4E-003  | 2      | 938.44402  | -2.74            | 26.64    | 0                  |
| 5 | ▶  | SQGGDGFYGR   | 1      | 4          | 1                | D6REE7                   |                      | 0.0000      | 9.251e6 | 30       | 7.5E-003  | 2      | 1043.45134 | -2.68            | 26.48    | 0                  |

**b**

Hela

RFP

DAPI

Merged

pDsRed2-FOXM1B

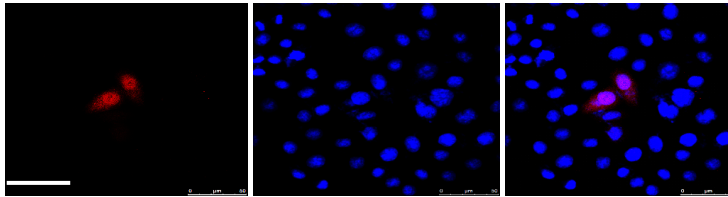

pDsRed2-FOXM1D

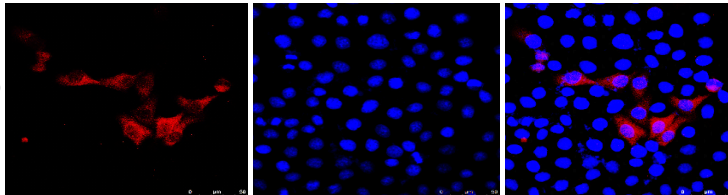**d**HA-FOXM1A  
HA-FOXM1B  
HA-FOXM1C  
HA-FOXM1D

IP: HA

Input

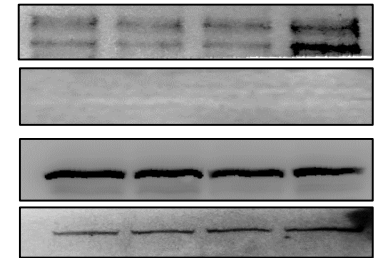

IB: ROCK2

IgG

IB: HA

ROCK2

**c**

FLAG

HA-ROCK2

Merged

Merged+DAPI

FLAG-FOXM1A

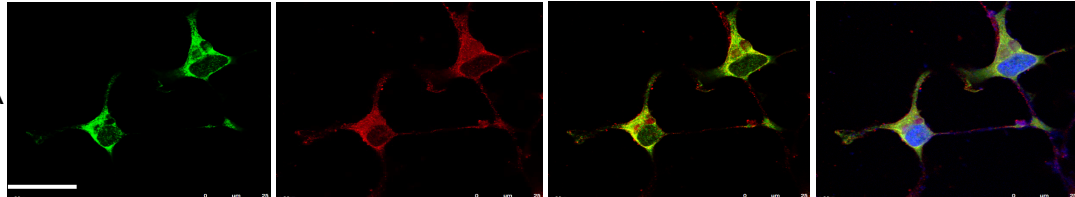

FLAG-FOXM1B

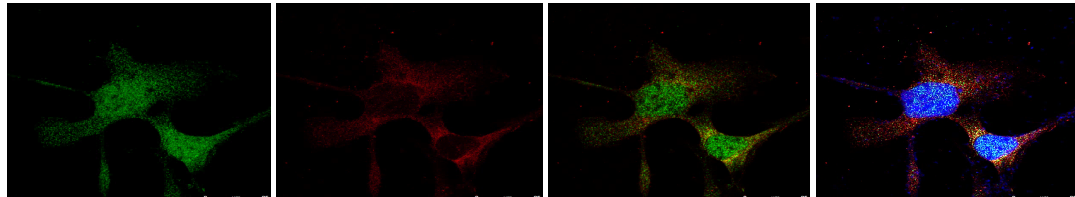

FLAG-FOXM1C

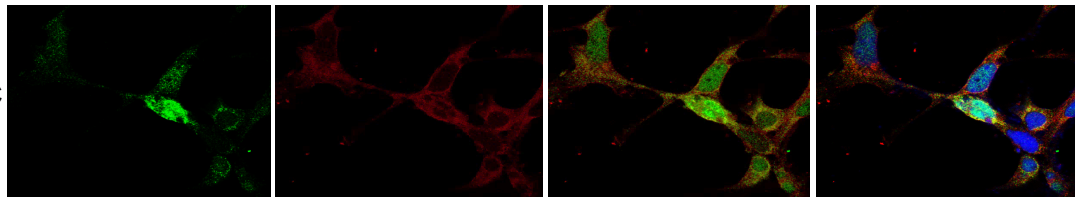

FLAG-FOXM1D

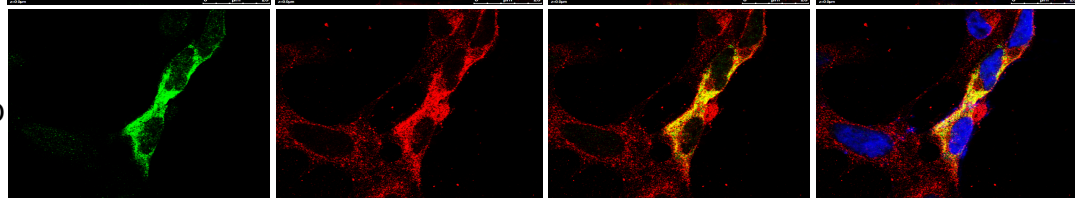

Supplement: onc2016249x8.pdf [file onc2016249x8.pdf]
