# Supplementary figures and images for: A novel FOXM1 isoform, FOXM1D, promotes epithelial–mesenchymal transition and metastasis through ROCKs activation in colorectal cancer
Source: PubMed Central journal article supplement — Oncogene. 2016 Jul 11;36(6):807–19. doi: 10.1038/onc.2016.249 (PMC5311249; doi:10.1038/onc.2016.249), 2016-07-11

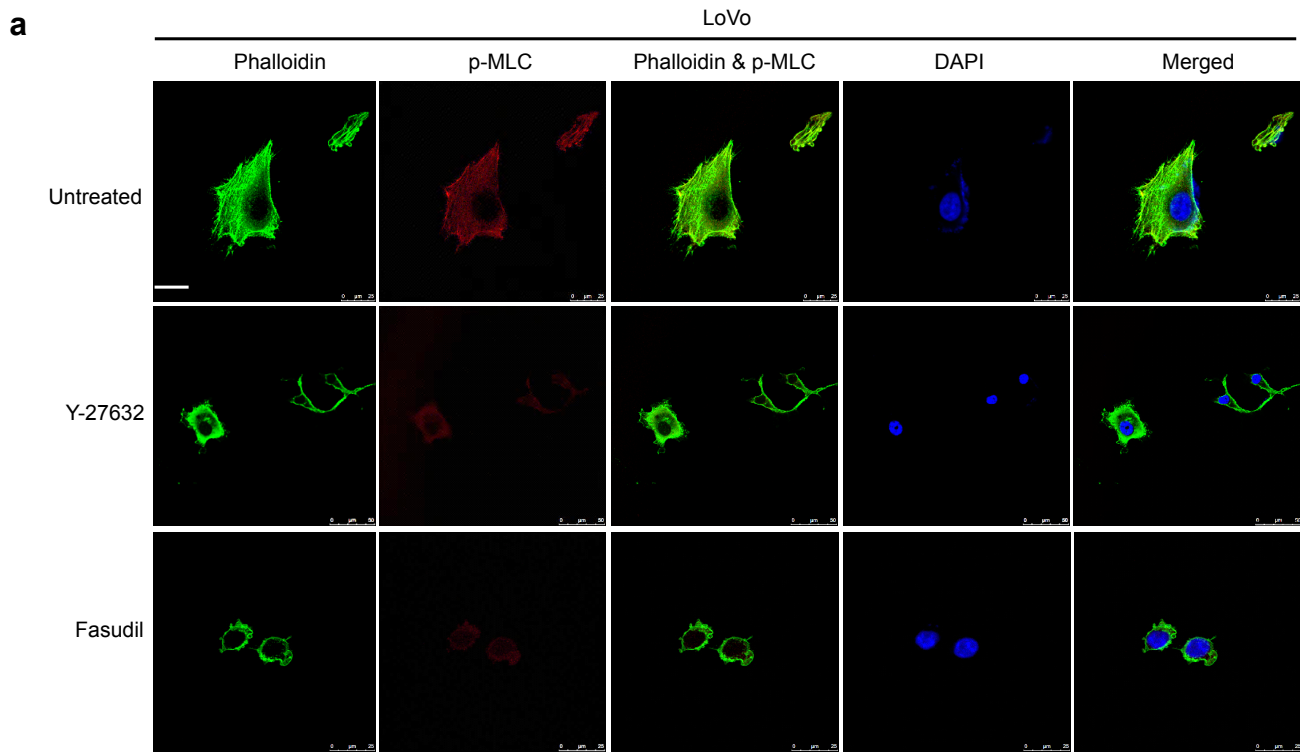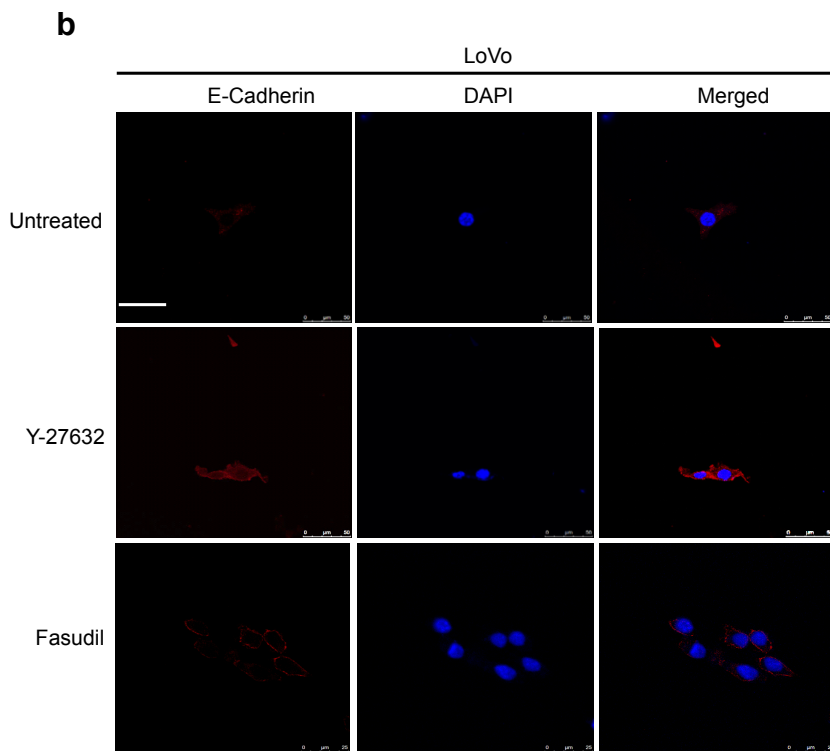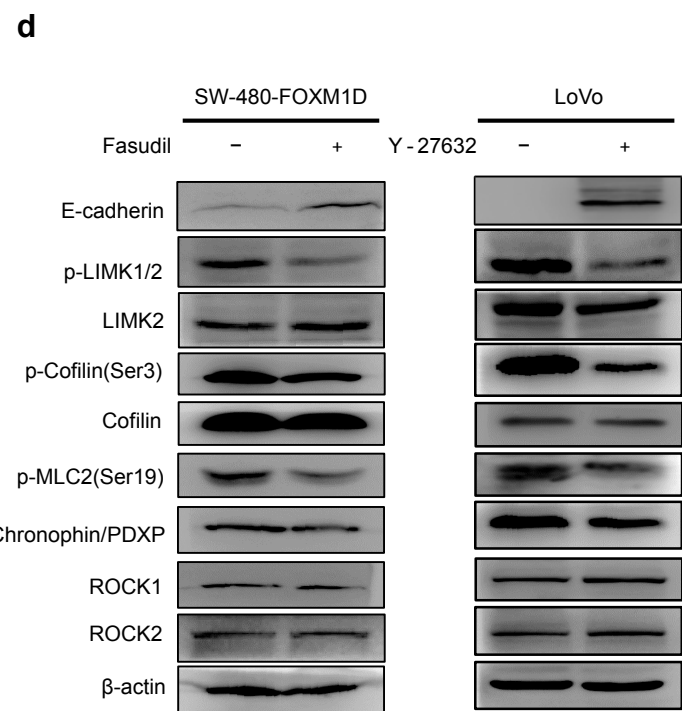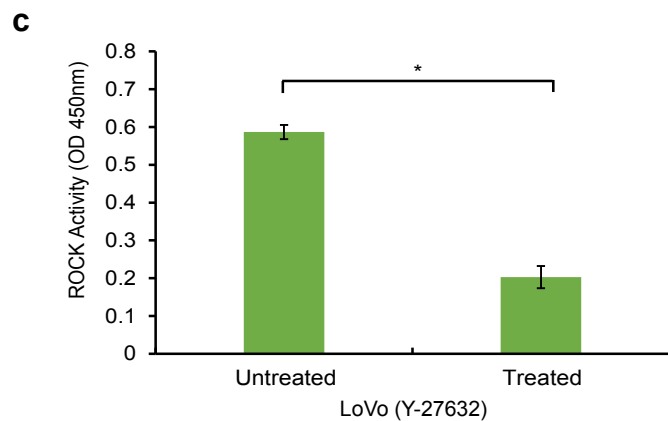

Supplement: onc2016249x10.pdf [file onc2016249x10.pdf]

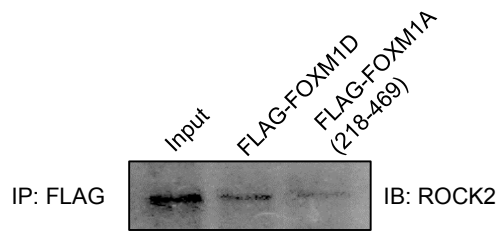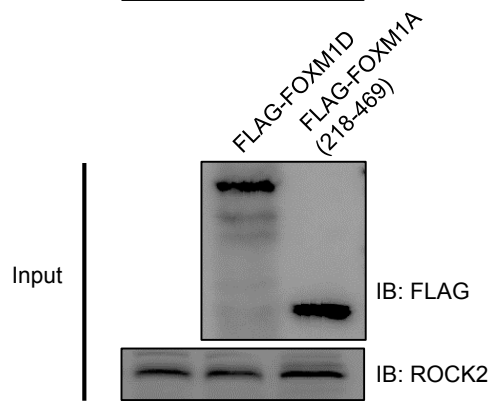

Supplement: onc2016249x11.pdf [file onc2016249x11.pdf]

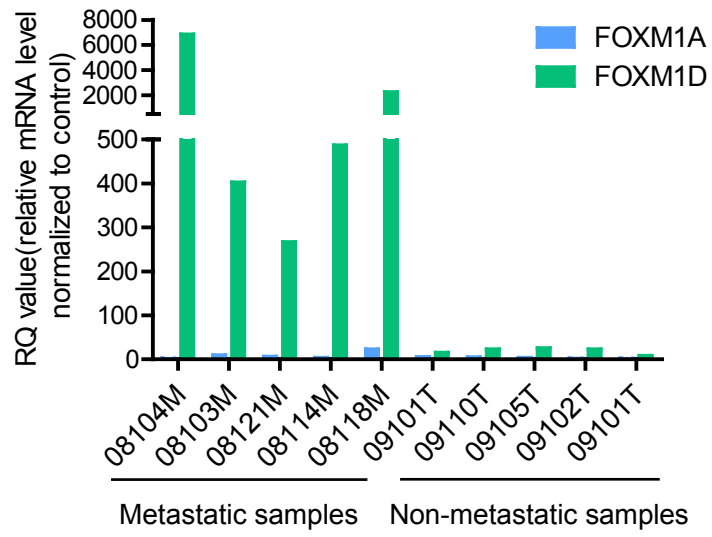

Supplement: onc2016249x12.pdf [file onc2016249x12.pdf]

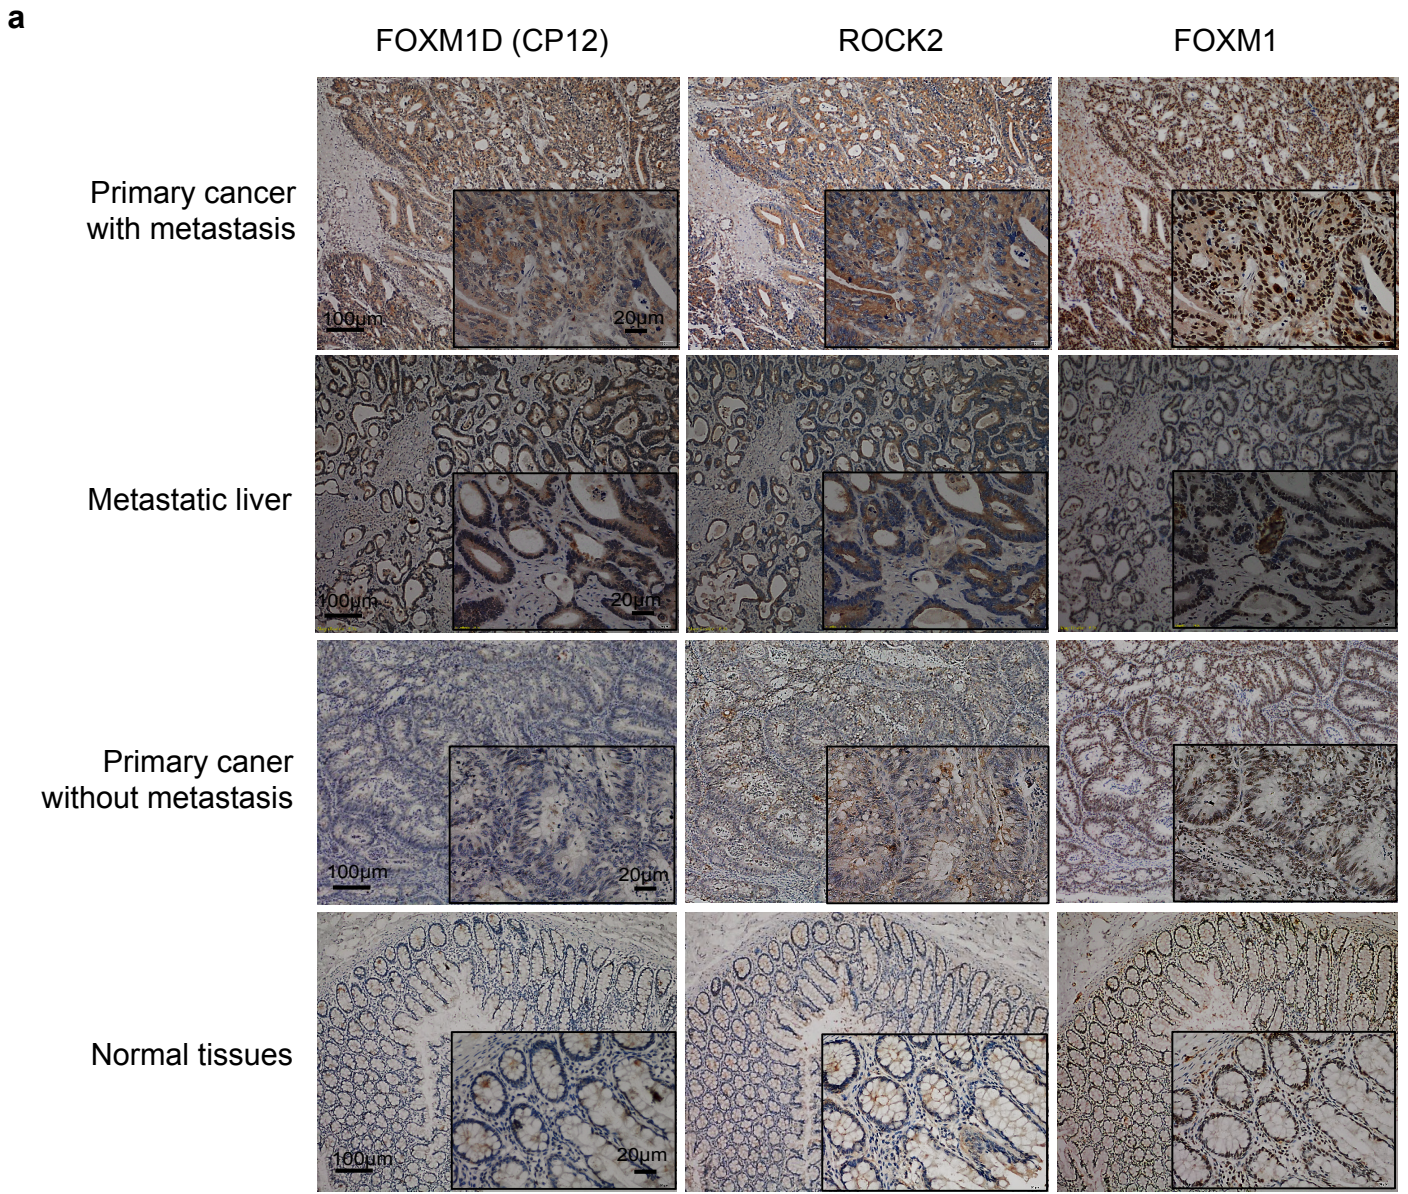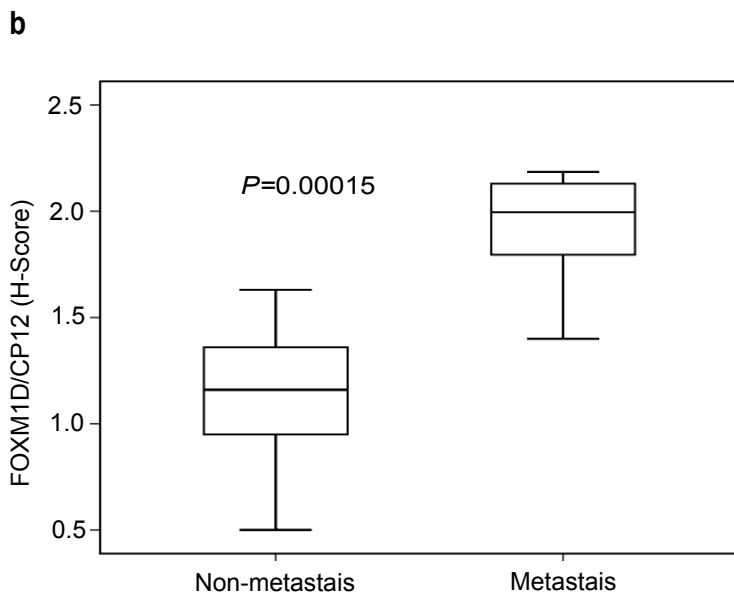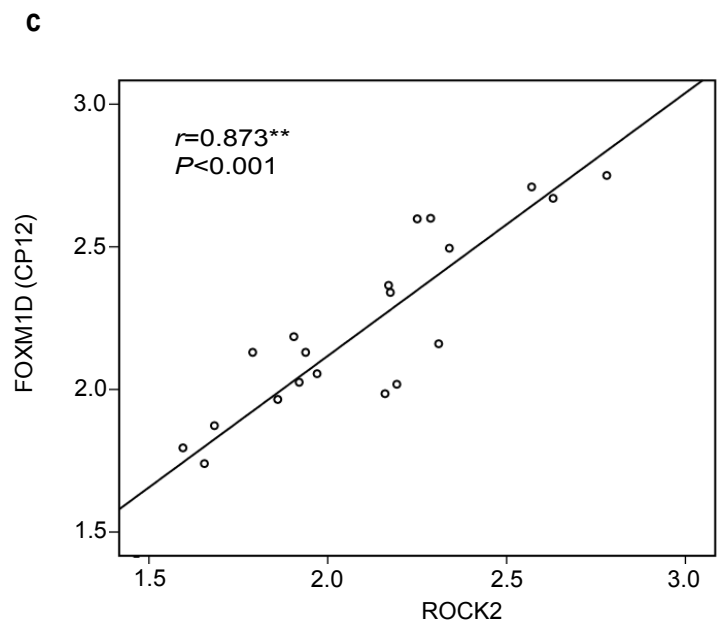

Supplement: onc2016249x13.pdf [file onc2016249x13.pdf]

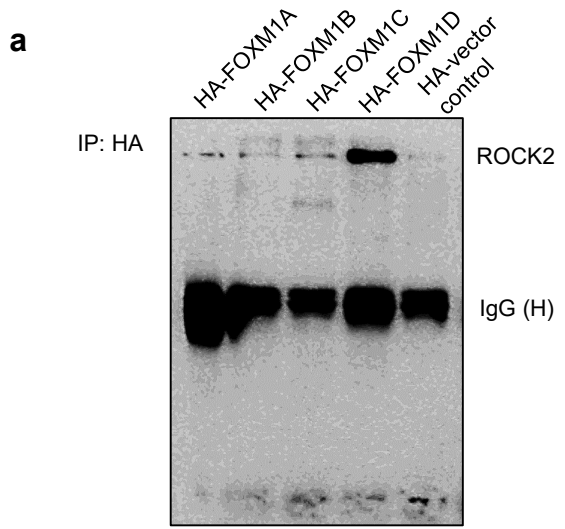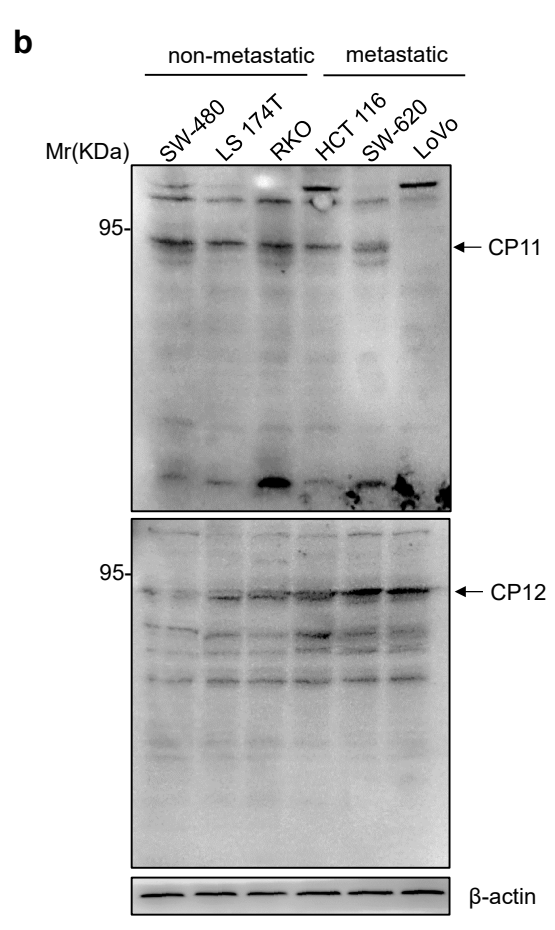

Supplement: onc2016249x14.pdf [file onc2016249x14.pdf]

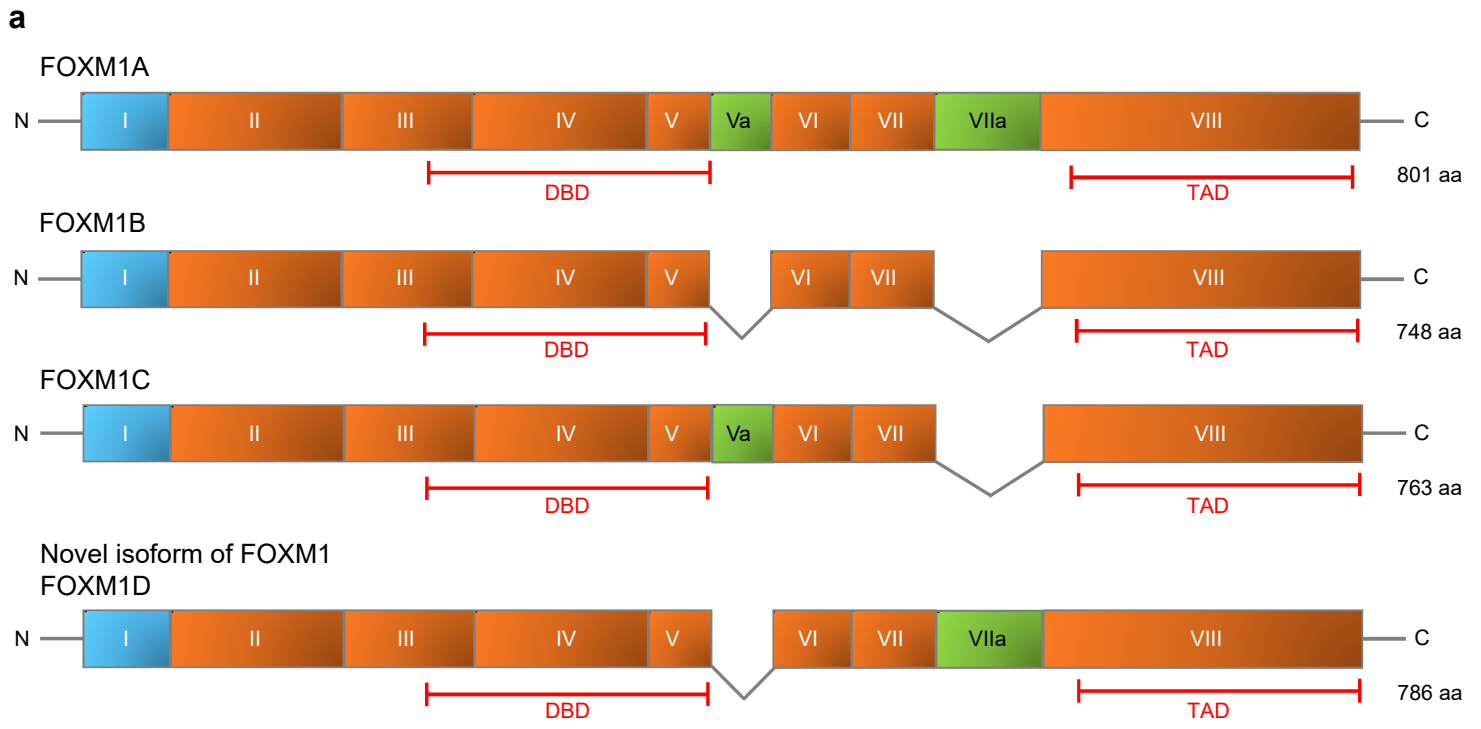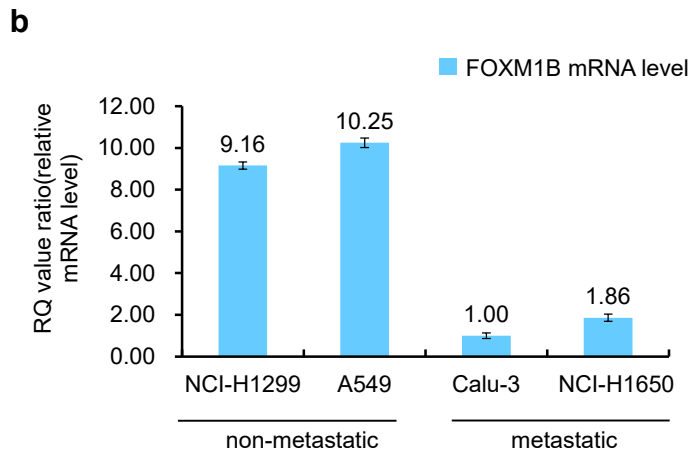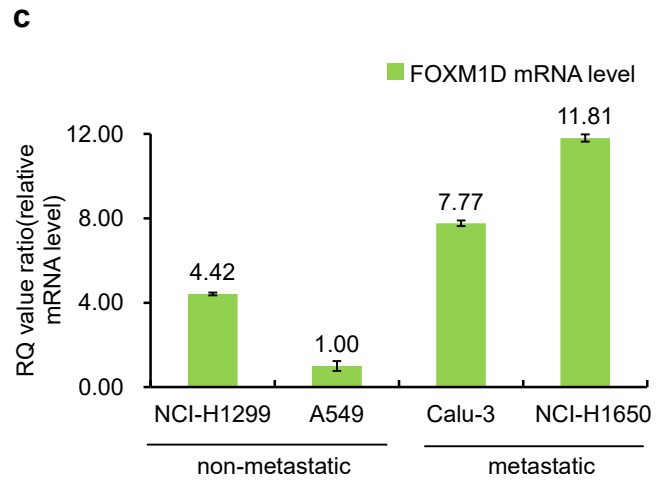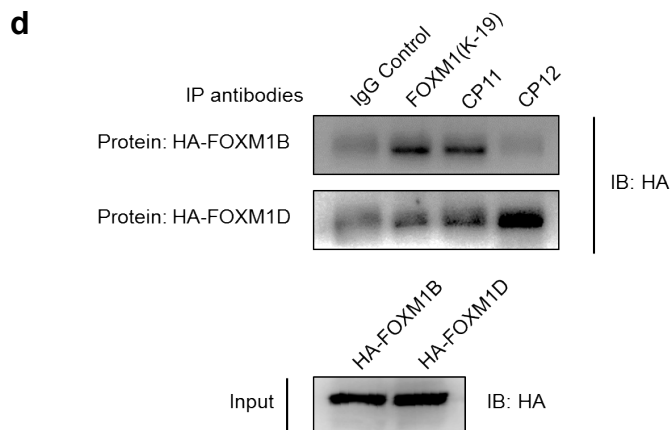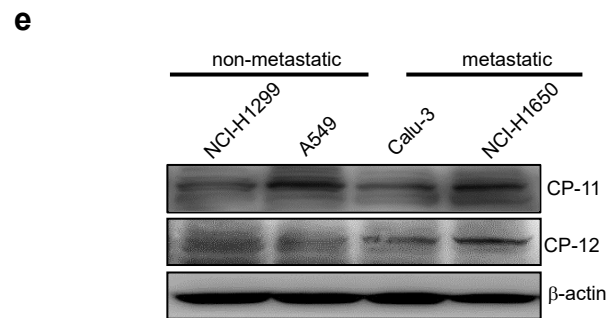

Supplement: onc2016249x2.pdf [file onc2016249x2.pdf]

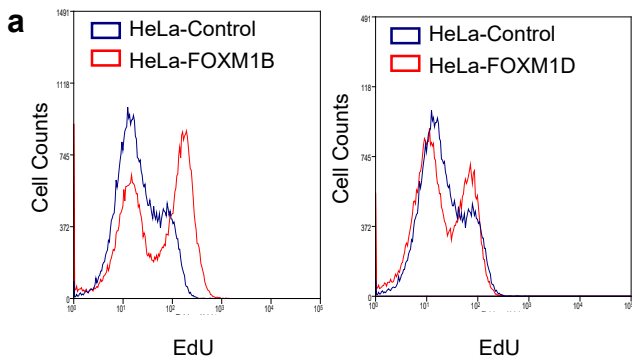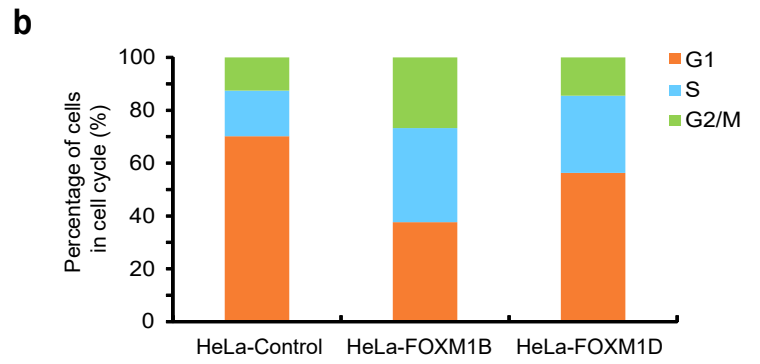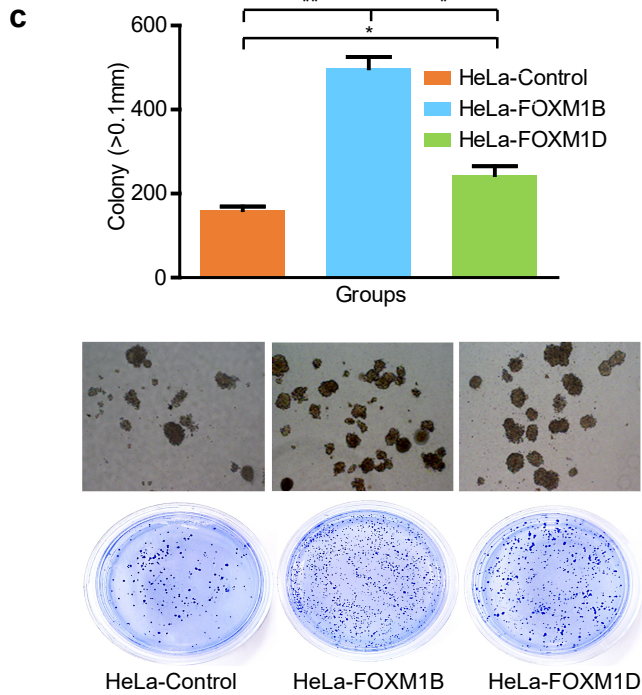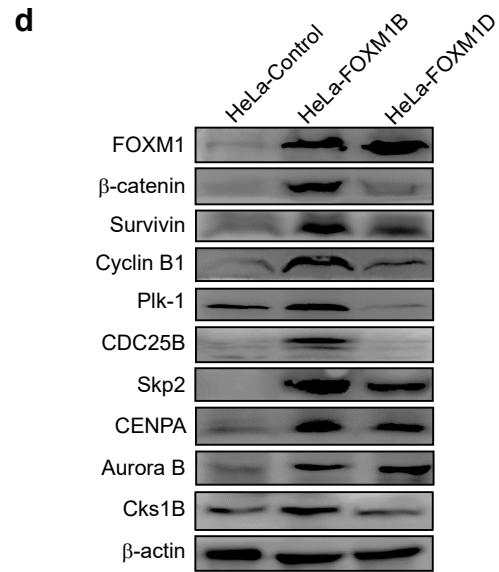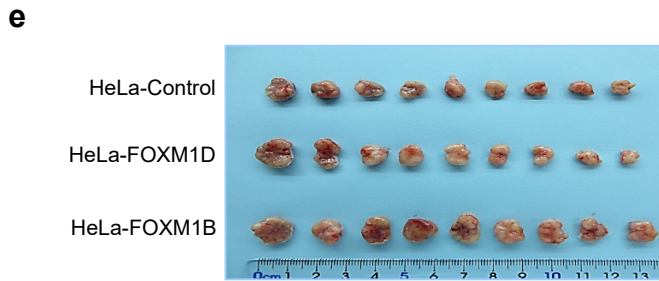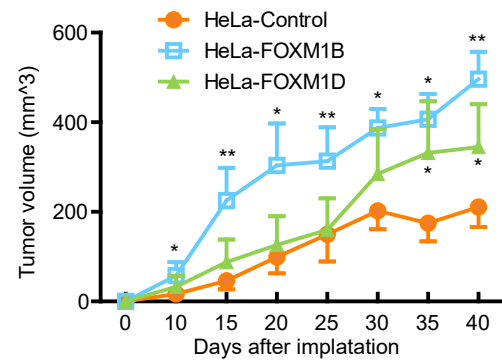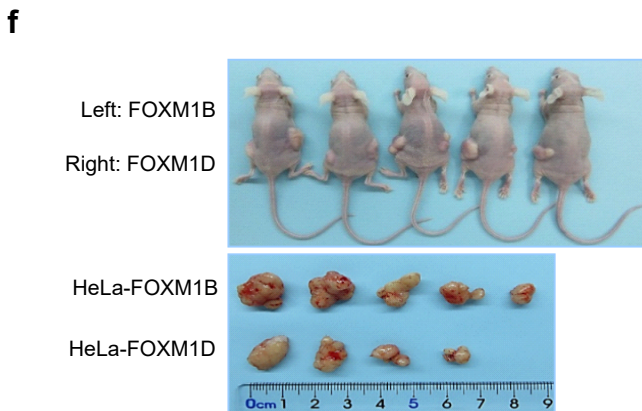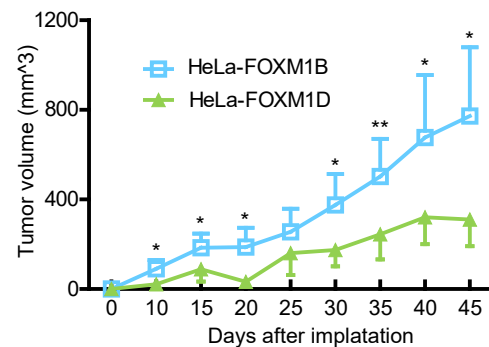

Supplement: onc2016249x3.pdf [file onc2016249x3.pdf]

**a**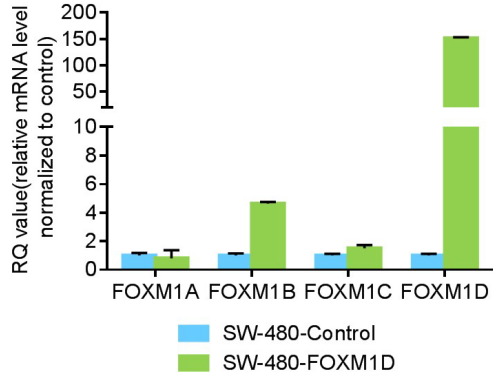**b**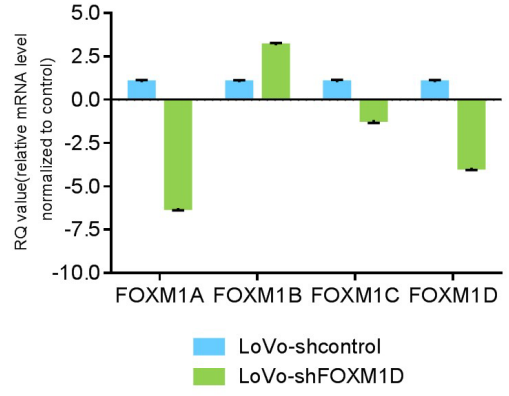

Supplement: onc2016249x4.pdf [file onc2016249x4.pdf]

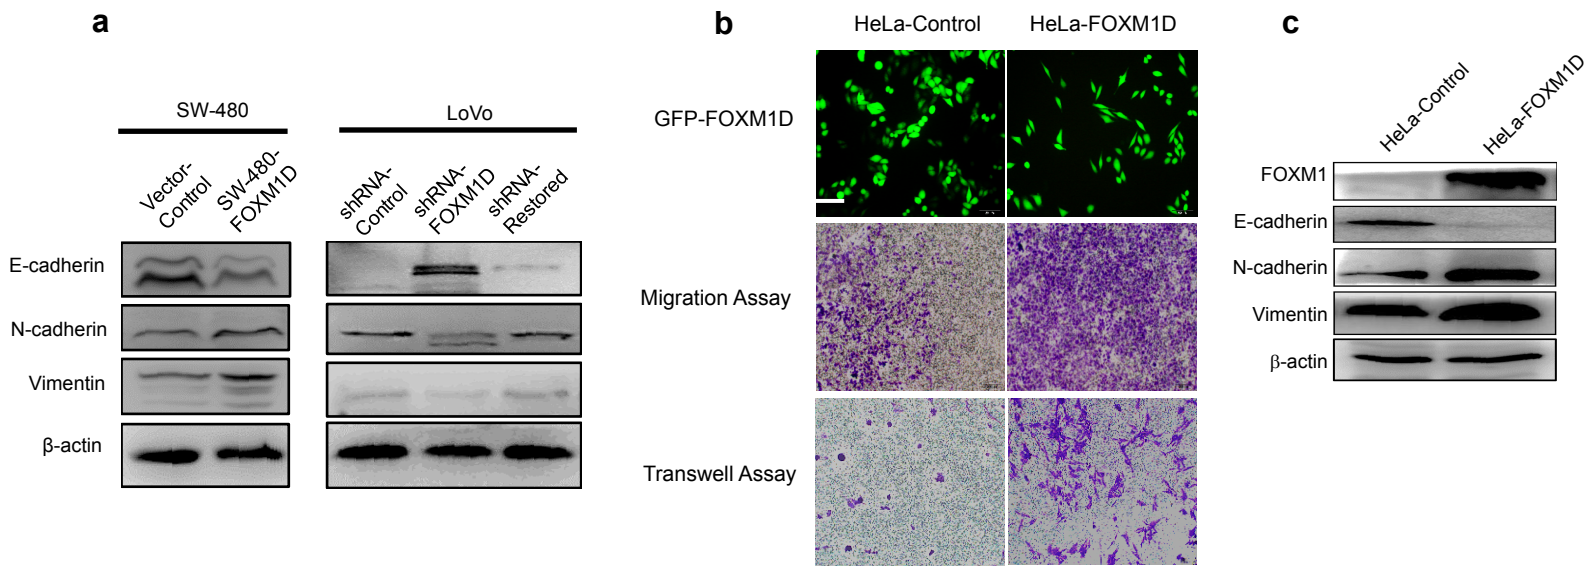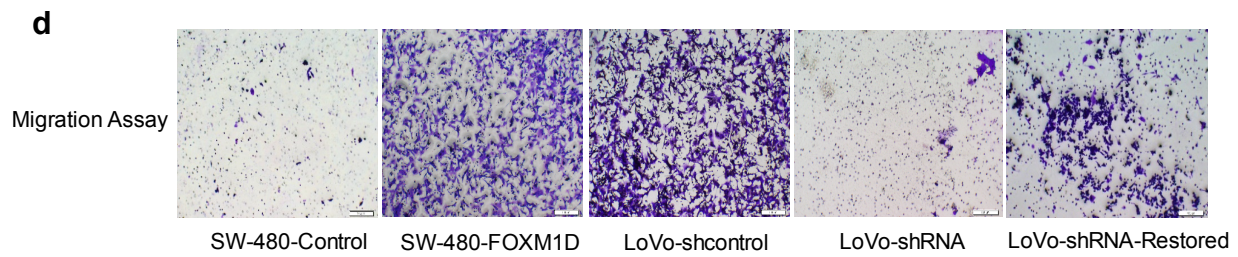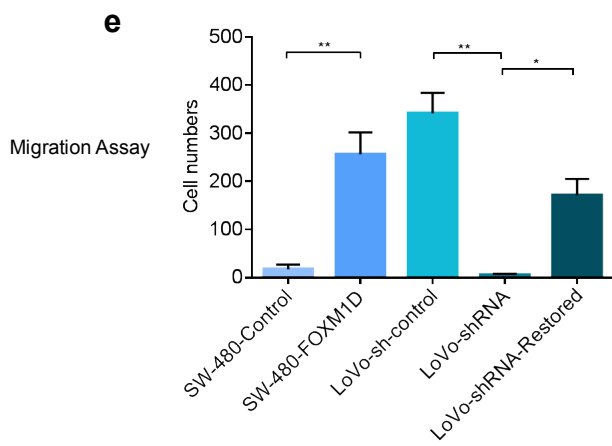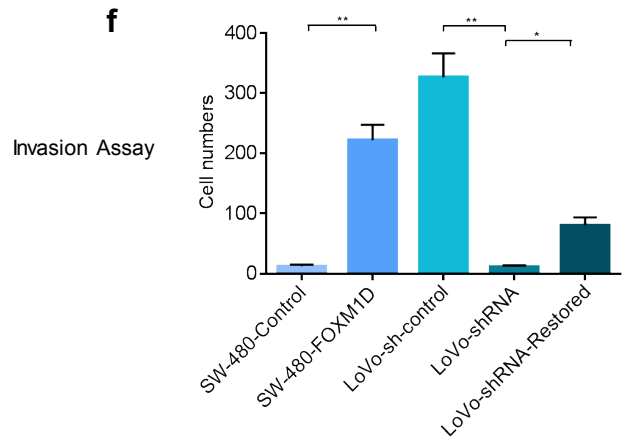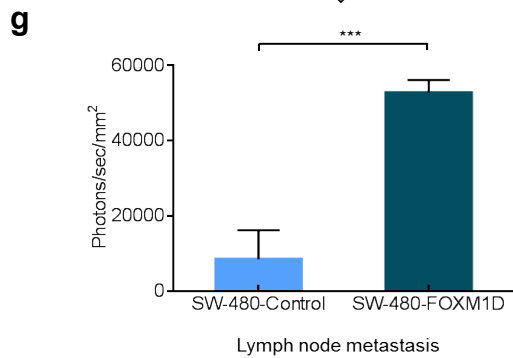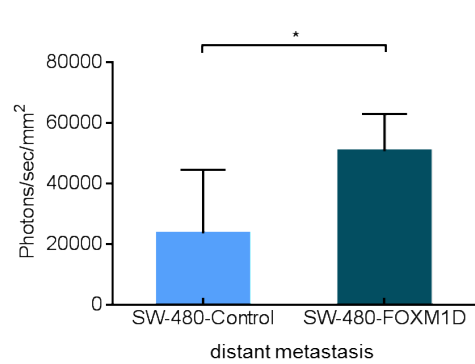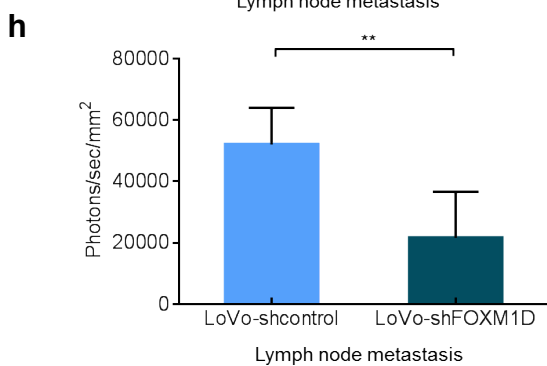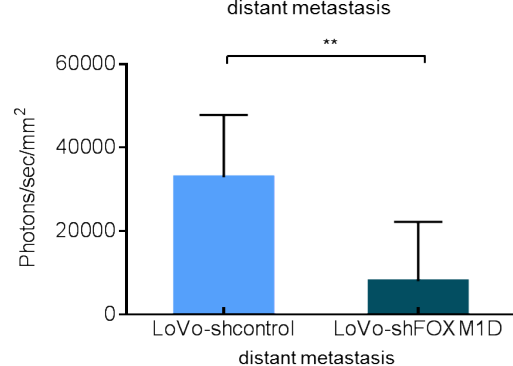

Supplement: onc2016249x5.pdf [file onc2016249x5.pdf]

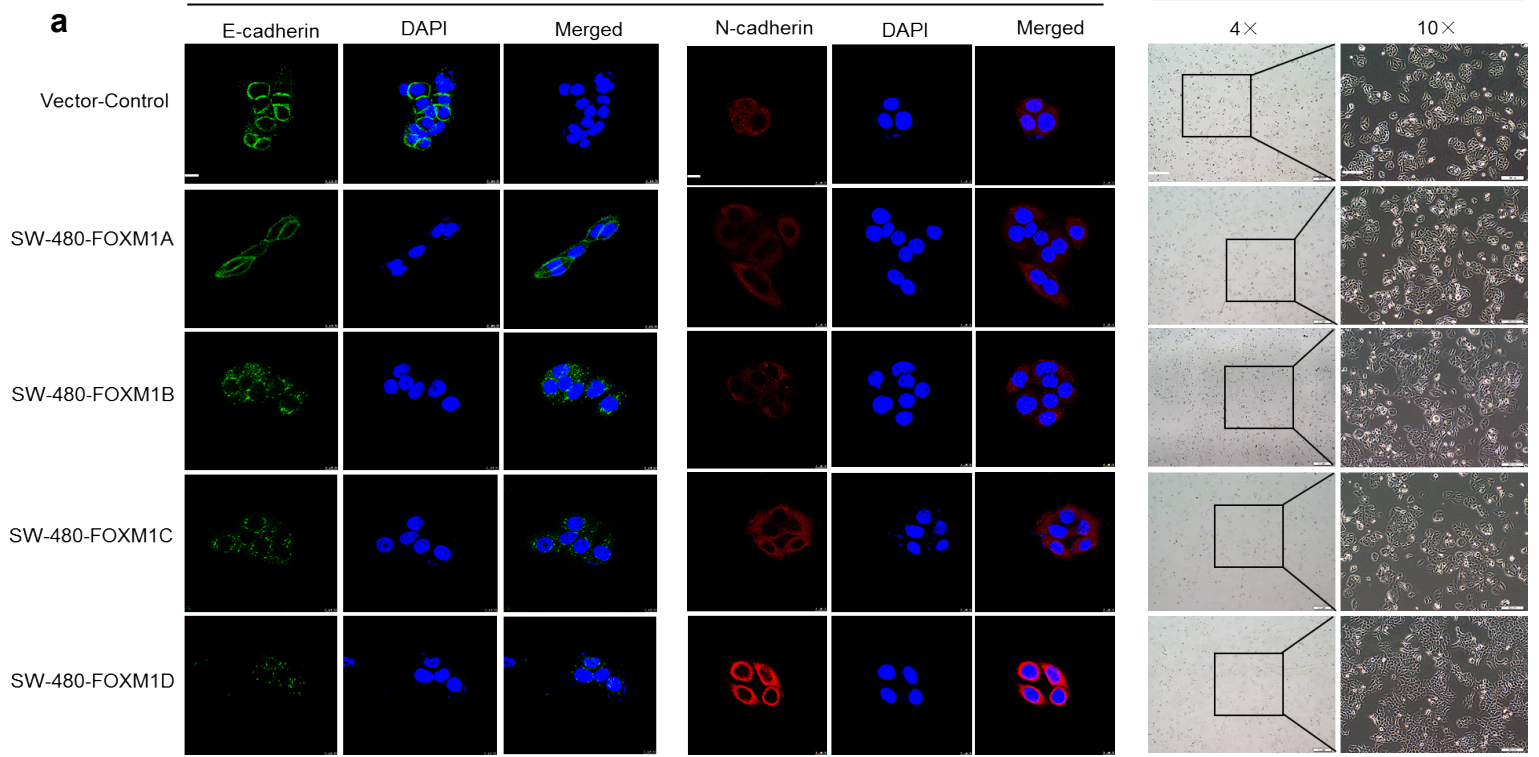**b**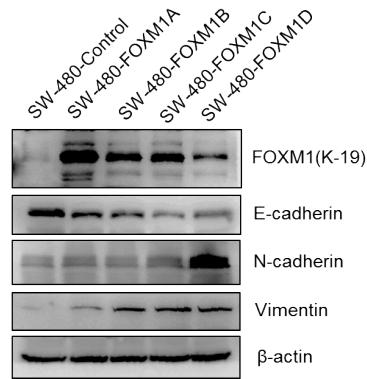**c**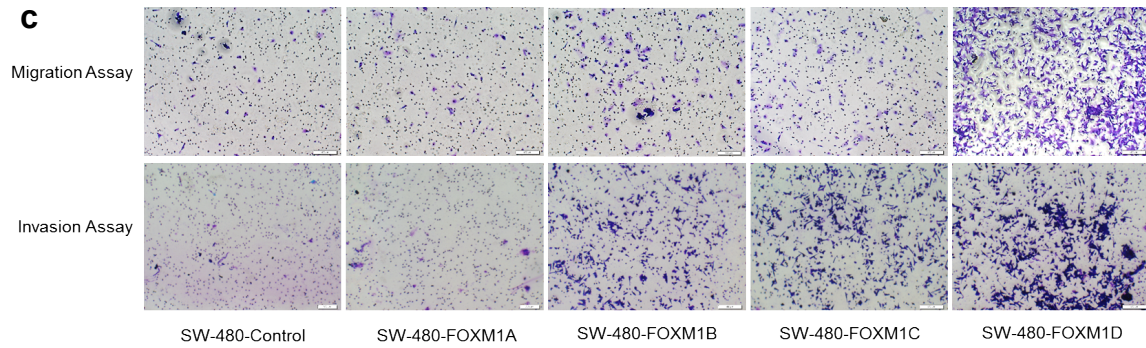**d**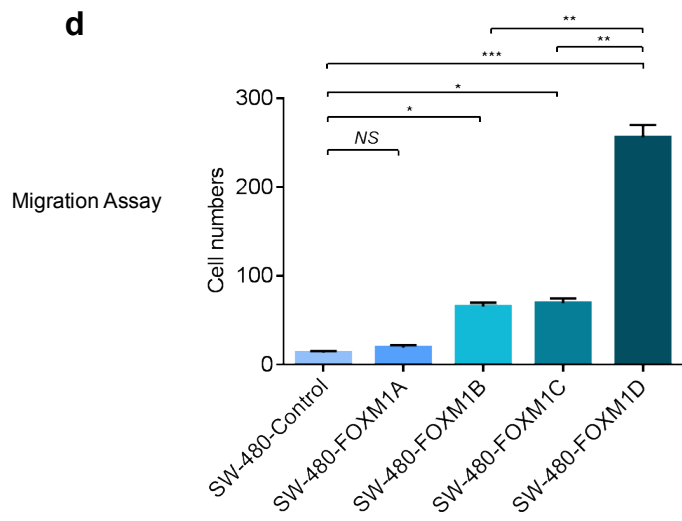**e**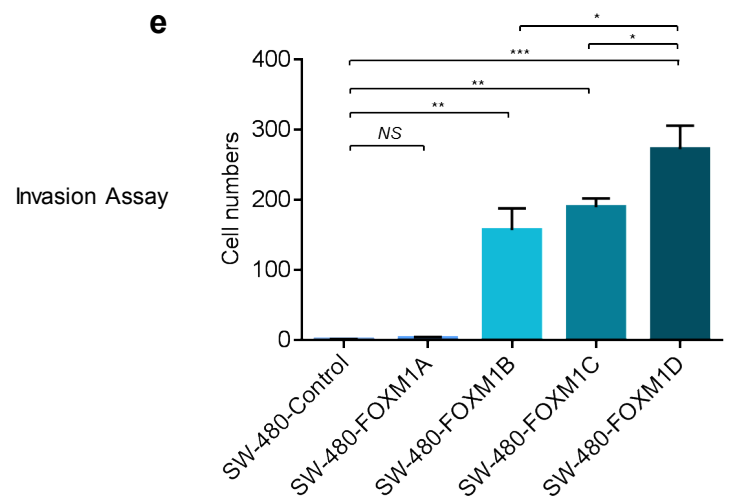

Supplement: onc2016249x6.pdf [file onc2016249x6.pdf]

**a**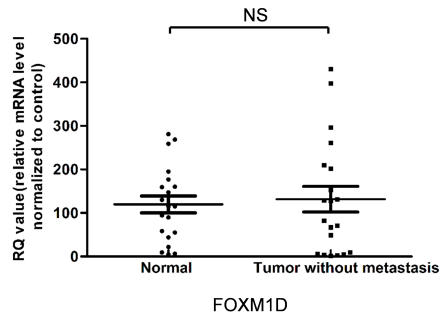**b**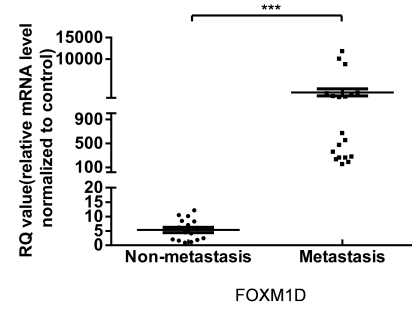**c**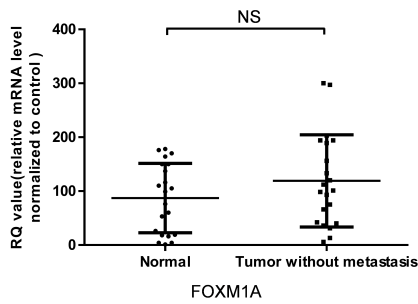**d**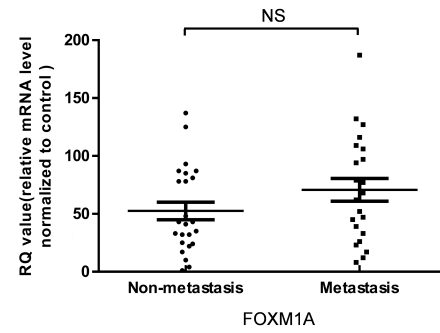**e**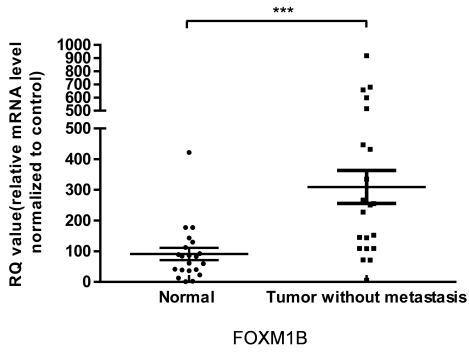**f**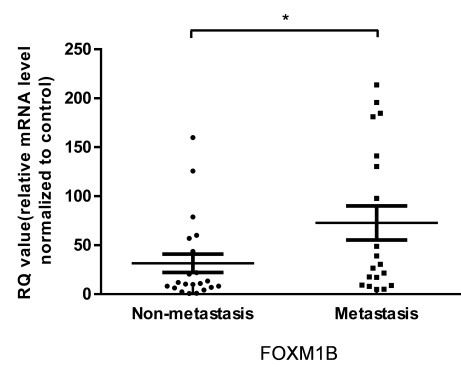**g**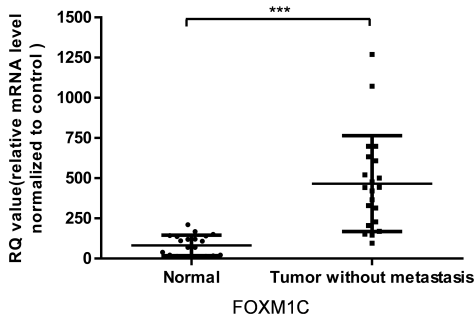**h**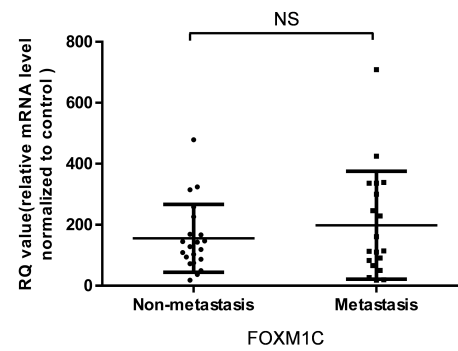

Supplement: onc2016249x7.pdf [file onc2016249x7.pdf]

**a**

LoVo-shRNA-Control

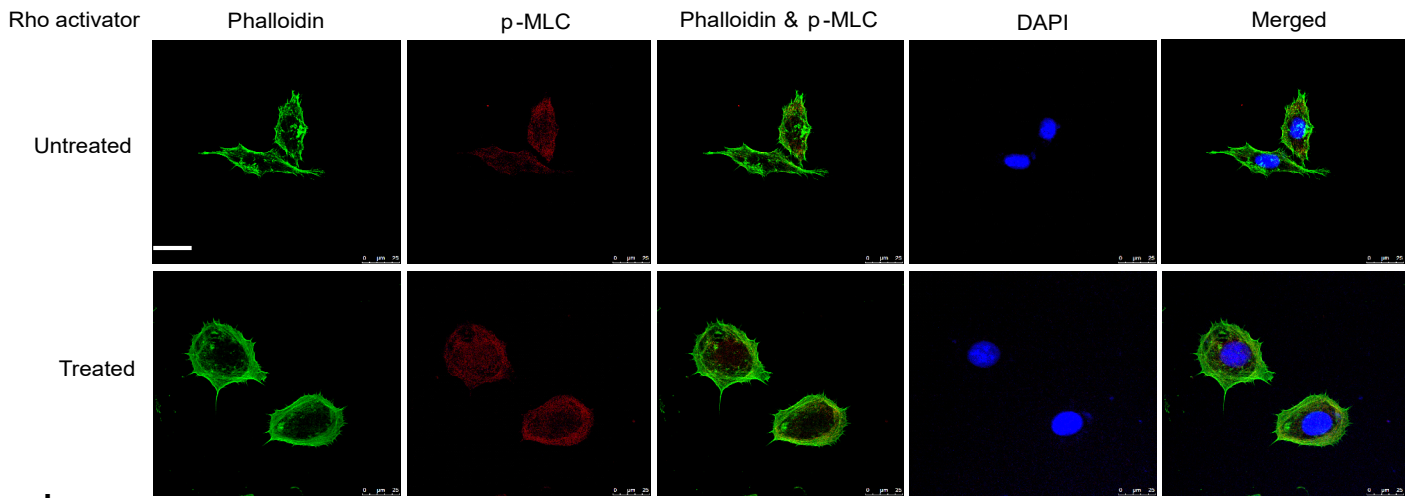**b**

LoVo-shRNA-FOXM1D

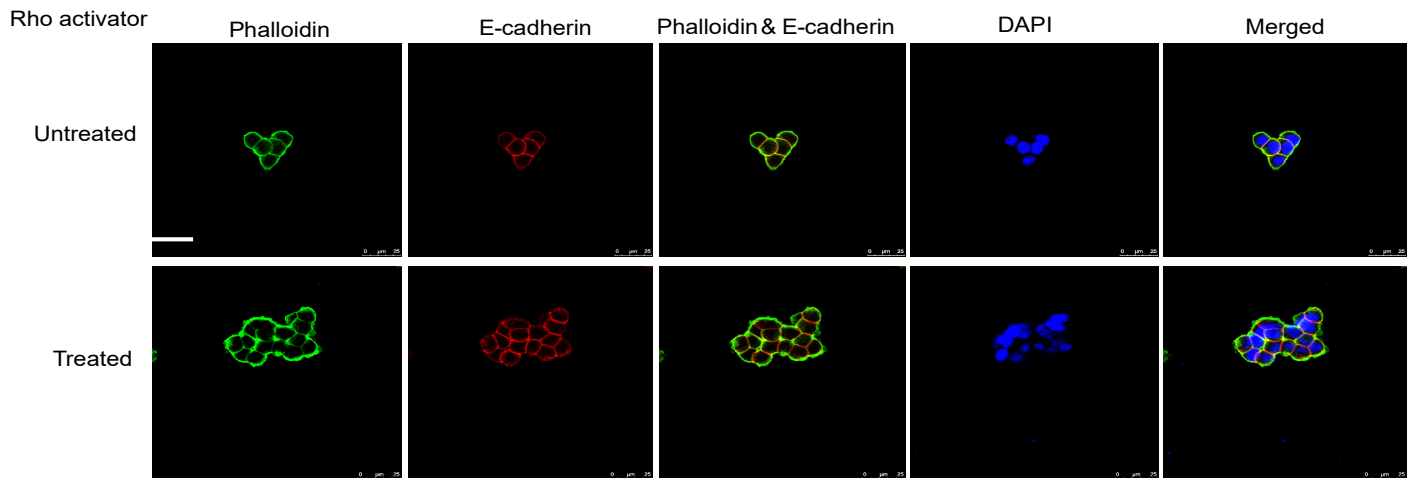**c**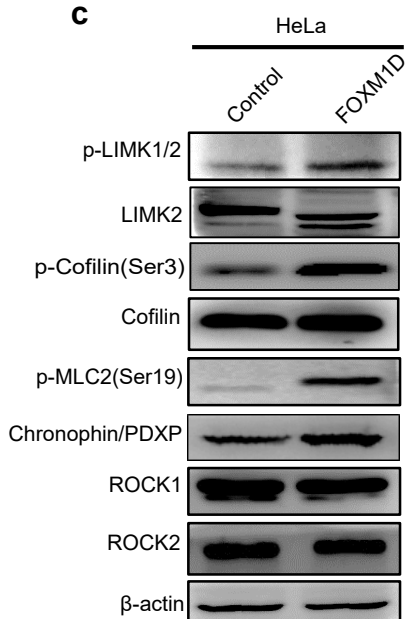**d**

SW-480-FOXM1D

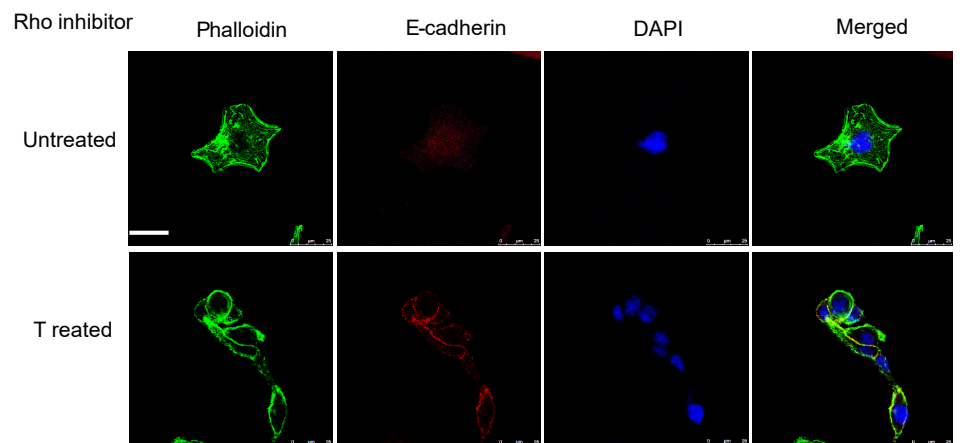

Supplement: onc2016249x9.pdf [file onc2016249x9.pdf]
